# Supplementary material
Source: PubMed Central journal article supplement (PMC10523169)
Supplement: jama-e2315787-s001.pdf [file jama-e2315787-s001.pdf]

## Supplemental Online Content

Olfson M, Cosgrove CM, Wall MM, Blanco C. Suicide risks of health care workers in the US. *JAMA*. doi:10.1001/jama.2023.15787

**eTable 1.** Suicide Risks of Health Care Workers Compared With Non–Health Care Workers Limited to Age 65 Years and Younger

**eTable 2.** Suicide Rates Per 100 000 Person-Years of Female and Male Health Care Workers and Non–Health Care Workers

This supplemental material has been provided by the authors to give readers additional information about their work.

| <b>eTable 1.</b> Suicide Risks of Health Care Workers Compared With Non–Health Care Workers Limited to Age 65 Years and Younger                                                                                                                                                                                                                                                                                               |                                                                                     |                                                                                     |
|-------------------------------------------------------------------------------------------------------------------------------------------------------------------------------------------------------------------------------------------------------------------------------------------------------------------------------------------------------------------------------------------------------------------------------|-------------------------------------------------------------------------------------|-------------------------------------------------------------------------------------|
| <b>Group</b>                                                                                                                                                                                                                                                                                                                                                                                                                  | Adjusted <sup>a</sup><br>HR (95% CI)<br>Other Employed<br>Adults Reference<br>Group | Adjusted <sup>b</sup><br>HR (95% CI)<br>Other Employed<br>Adults Reference<br>Group |
| Healthcare workers, total (N=176,000)                                                                                                                                                                                                                                                                                                                                                                                         | 1.31 (1.12-1.54)                                                                    | 1.32 (1.13-1.55)                                                                    |
| Physicians (N=13,000)                                                                                                                                                                                                                                                                                                                                                                                                         | 1.01 (0.63-1.62)                                                                    | 1.04 (0.65-1.66)                                                                    |
| Registered nurses (N=42,000)                                                                                                                                                                                                                                                                                                                                                                                                  | 1.62 (1.19-2.11)                                                                    | 1.70 (1.25-2.33)                                                                    |
| Other health diagnosing and treating practitioners (N=22,500)                                                                                                                                                                                                                                                                                                                                                                 | 0.64 (0.38-1.08)                                                                    | 0.65 (0.38-1.11)                                                                    |
| Health technicians (N=32,500)                                                                                                                                                                                                                                                                                                                                                                                                 | 1.40 (1.03-1.91)                                                                    | 1.42 (1.04-1.94)                                                                    |
| Healthcare support workers (N=39,000)                                                                                                                                                                                                                                                                                                                                                                                         | 1.79 (1.33-2.40)                                                                    | 1.72 (1.28-2.30)                                                                    |
| Social/behavioral health workers (N=27,000)                                                                                                                                                                                                                                                                                                                                                                                   | 1.14 (0.75-1.74)                                                                    | 1.11 (0.73-1.69)                                                                    |
| Healthcare workers, total by sex                                                                                                                                                                                                                                                                                                                                                                                              |                                                                                     |                                                                                     |
| Males (N=38,500)                                                                                                                                                                                                                                                                                                                                                                                                              | 1.09 (0.86-1.39)                                                                    | 1.10 (0.87-1.39)                                                                    |
| Females (N=137,500)                                                                                                                                                                                                                                                                                                                                                                                                           | 1.52 (1.23-1.90)                                                                    | 1.55 (1.25-1.93)                                                                    |
| MDAC. Limited to adults 26 to 65 years. Respondents followed through 2019.<br>Numbers in row headings are based on unweighted n's and rounded to 500s following Census rules.<br><sup>a</sup> Adjusted for age, sex, race/ethnicity, marital status, education, and residence.<br><sup>b</sup> Adjusted for age, sex, race/ethnicity, marital status, education, residence, and income.<br>DRB release: CBDRB-FY23-CES004-027 |                                                                                     |                                                                                     |

| <b>eTable 2.</b> (Data for Figure 2). Suicide Rates Per 100 000 Person-Years of Female and Male Health Care Workers and Non-Health Care Workers                    |                                   |
|--------------------------------------------------------------------------------------------------------------------------------------------------------------------|-----------------------------------|
| Occupational Group                                                                                                                                                 | Suicides / 100,000 years (95% CI) |
| Registered nurses, females (N=38,500)                                                                                                                              | 8.6 (6.0, 12.0)                   |
| Healthcare support workers, females (N=35,000)                                                                                                                     | 8.0 (5.6, 11.4)                   |
| Male healthcare support workers, males (N=3,900)                                                                                                                   | 33.1 (18.8, 53.9)                 |
| Female health technicians, females (N=26,000)                                                                                                                      | 8.6 (5.5, 12.8)                   |
| Male health technicians, males (N=6,000)                                                                                                                           | 21.5 (12.5, 34.5)                 |
| Social/behavioral health workers, females (N=20,000)                                                                                                               | 5.3 (2.7, 9.4)                    |
| Social/behavioral health workers, males (N=7,000)                                                                                                                  | 14.3 (7.3, 25.2)                  |
| Other health diagnosing and treating practitioners, females (N=13,500)                                                                                             | 1.1 (0.1, 4.6)                    |
| Other health diagnosing and treating practitioners, males (N=8,600)                                                                                                | 14.1 (7.4, 24.2)                  |
| Physicians, males (N=8,900) <sup>a</sup>                                                                                                                           | 23.7 (15.0, 35.6)                 |
| Non-healthcare workers, females (N=739,000)                                                                                                                        | 4.8 (4.3, 5.2)                    |
| Non-healthcare workers, males (N=922,000)                                                                                                                          | 19.5 (18.7, 20.4)                 |
| Numbers in rows are based on unweighted n's and rounded to 500s following Census rules.                                                                            |                                   |
| <sup>a</sup> Following US Census rules, the suicide rates of male registered nurses and female physicians are suppressed to protect participant re-identification. |                                   |
| DRB Approval Number: CBDRD-FY-23-CES004-029                                                                                                                        |                                   |
