# Supplementary material
Source: PubMed Central journal article supplement (PMC10523169)
Supplement: jama-e2315787-s002.pdf [file jama-e2315787-s002.pdf]

## Data Sharing Statement

Olfson. Suicide Risks of Health Care Workers in the US. *JAMA*. Published September 26, 2023. doi:10.1001/jama.2023.15787

### Data

**Data available:** Yes

**Data types:** Data dictionary

**How to access data:** The reference manual and data dictionary are available at:

[https://www.census.gov/topics/research/mdac.Reference\\_Manual.html#list-tab-1414305400](https://www.census.gov/topics/research/mdac.Reference_Manual.html#list-tab-1414305400)

**When available:** beginning date: 01-01-2017

### Supporting Documents

**Document types:** None

### Additional Information

**Who can access the data:** The data is made available by application to the US Census Bureau following instructions described at <https://www.census.gov/topics/research/mdac.html>

**Types of analyses:** The data will be made available for specified purposes that are reviewed and approved by the sponsoring agency and the MDAC Steering Committee.

**Mechanisms of data availability:** The investigator first contacts a MDAC sponsoring agency and proposes a project to obtain their support, which is reviewed for approval by the MDAC Steering Committee. Committee approved projects are assigned to an MDAC statistician within the U.S. Census Bureau. The assigned statistician works directly with the researcher through a secure online system (RODAS) and as the interface to the MDAC database.

**Any additional restrictions:** Prior to release, all data outputs must be reviewed and approved by the US Census Disclosure Review Board.
